# Supplementary material
Source: PubMed Central journal article supplement (PMC2855264)
Supplement: jn.109.114629_1.pdf [file jn.109.114629_1.pdf]

## Online Supporting Material

**Supplemental Table 1** Percent of adult (18+ y) men and women participating in the CoASTAL cohort meeting the DRI for the macronutrients, cholesterol, and fiber in comparison to adult (19+ y) men and women sampled in NHANES 2001-2002<sup>1,2</sup>

| Variables <sup>3</sup> | Men           |                                    |                                   |                                   |                                     | Women         |                                    |                                   |                                    |                                     |
|------------------------|---------------|------------------------------------|-----------------------------------|-----------------------------------|-------------------------------------|---------------|------------------------------------|-----------------------------------|------------------------------------|-------------------------------------|
|                        | DRI           | NHANES<br>01-02<br><i>n</i> = 2380 | Total<br>sample<br><i>n</i> = 175 | Plausible<br>rEI<br><i>n</i> = 89 | Implausible<br>rEI<br><i>n</i> = 86 | DRI           | NHANES<br>01-02<br><i>n</i> = 2267 | Total<br>sample<br><i>n</i> = 243 | Plausible<br>rEI<br><i>n</i> = 147 | Implausible<br>rEI<br><i>n</i> = 96 |
|                        | AMDR          |                                    | % within AMDR                     |                                   |                                     | AMDR          |                                    | % within AMDR                     |                                    |                                     |
| PRO, % energy          | 10-35         | ...                                | 98                                | 99                                | 98                                  | 10-35         | ...                                | 96                                | 97                                 | 96                                  |
| CHO, % energy          | 45-65         | ...                                | 58                                | 57                                | 59                                  | 45-65         | ...                                | 68                                | 70                                 | 65                                  |
| TFA, % energy          | 20-35         | ...                                | 38                                | 36                                | 40                                  | 20-35         | ...                                | 43                                | 40                                 | 47                                  |
| SFA, % energy          | <10           | ...                                | 27                                | 25                                | 30                                  | <10           | ...                                | 31                                | 27                                 | 37                                  |
|                        | EAR           |                                    | % less than EAR                   |                                   |                                     | EAR           |                                    | % less than EAR                   |                                    |                                     |
| PRO                    | 0.66-<br>0.73 | <3                                 | 23                                | 3                                 | 43***                               | 0.66-<br>0.71 | 7                                  | 26                                | 11                                 | 48***                               |
| CHO                    | 100           | <3                                 | 3                                 | 0                                 | 7                                   | 100           | <3                                 | 4                                 | 0                                  | 10                                  |
|                        | AI            |                                    | % greater than AI                 |                                   |                                     | AI            |                                    | % greater than AI                 |                                    |                                     |
| Dietary fiber          | 30-38         | <3                                 | 2                                 | 2                                 | 1                                   | 21-26         | 8                                  | 0                                 | 0                                  | 0                                   |
| Linoleic acid          | 14-17         | 53                                 | 39                                | 56                                | 21***                               | 11-12         | 56                                 | 59                                | 74                                 | 37***                               |
| ALA                    | 1.6           | 52                                 | 33                                | 51                                | 14***                               | 1.1           | 61                                 | 58                                | 71                                 | 39***                               |
| EPA + DHA              | 0.65          | ...                                | 14                                | 16                                | 12                                  | 0.65          | ...                                | 7                                 | 10                                 | 4                                   |

<sup>1</sup> Values are %. Asterisks indicate different from plausible rEI: \*  $P < 0.05$ , \*\*  $P < 0.01$ , \*\*\*  $P < 0.001$ .

<sup>2</sup> As estimated by 24-h recall from Moshfegh A, Goldman J, Cleveland L. What we eat in America, NHANES 2001-2002: Usual nutrient intakes from food compared to dietary reference intakes. USDA, ARS: 2005. p. 1-56.

<sup>3</sup> PRO=protein, CHO=carbohydrate, TFA=total fat, SFA=saturated fat, ALA = linolenic acid

**Supplemental Table 2** Percent of adult (18+ y) men and women participating in the CoASTAL cohort meeting the DRI for vitamins in comparison to adult (20+ y) men and women sampled in NHANES 2001-2002<sup>1,2</sup>

| Vitamins                  | Men     |                                    |                                   |                                   |                                     | Women   |                                    |                                   |                                    |                                     |
|---------------------------|---------|------------------------------------|-----------------------------------|-----------------------------------|-------------------------------------|---------|------------------------------------|-----------------------------------|------------------------------------|-------------------------------------|
|                           | DRI     | NHANES<br>01-02<br><i>n</i> = 2380 | Total<br>sample<br><i>n</i> = 175 | Plausible<br>rEI<br><i>n</i> = 89 | Implausible<br>rEI<br><i>n</i> = 86 | DRI     | NHANES<br>01-02<br><i>n</i> = 2267 | Total<br>sample<br><i>n</i> = 243 | Plausible<br>rEI<br><i>n</i> = 147 | Implausible<br>rEI<br><i>n</i> = 96 |
|                           | EAR     |                                    | % less than EAR                   |                                   |                                     | EAR     |                                    | % less than EAR                   |                                    |                                     |
| Vitamin A                 | 625-630 | 57                                 | 66                                | 58                                | 74*                                 | 485-500 | 48                                 | 51                                | 48                                 | 56                                  |
| Vitamin E                 | 12      | 89                                 | 89                                | 88                                | 90                                  | 12      | 97                                 | 89                                | 87                                 | 93                                  |
| Vitamin C <sup>3</sup>    | 63-75   | 40                                 | 65                                | 53                                | 78**                                | 56-60   | 38                                 | 51                                | 45                                 | 59*                                 |
| Vitamin B-6               | 1.1-1.4 | 7                                  | 19                                | 5                                 | 35***                               | 1.0-1.3 | 28                                 | 25                                | 14                                 | 42***                               |
| Vitamin B-12 <sup>4</sup> | 2.0     | ...                                | 10                                | 2                                 | 17**                                | 2.0     | ...                                | 10                                | 8                                  | 14                                  |
| Thiamin                   | 1.0     | 4                                  | 9                                 | 0                                 | 19                                  | 0.9     | 10                                 | 10                                | 1                                  | 23***                               |
| Riboflavin                | 1.1     | <3                                 | 7                                 | 1                                 | 13*                                 | 0.9     | <3                                 | 5                                 | 1                                  | 13**                                |
| Niacin                    | 12      | <3                                 | 6                                 | 0                                 | 13                                  | 11      | 5                                  | 5                                 | 1                                  | 13**                                |
| Folate                    | 320-330 | 6                                  | 17                                | 3                                 | 30***                               | 320-330 | 16                                 | 19                                | 12                                 | 31***                               |
|                           | AI      |                                    | % greater than AI                 |                                   |                                     | AI      |                                    | % greater than AI                 |                                    |                                     |
| Vitamin K                 | 75-120  | 20                                 | 12                                | 15                                | 9                                   | 75-90   | 41                                 | 24                                | 27                                 | 20                                  |

<sup>1</sup> Values are %. Asterisks indicate different from plausible rEI: \*  $P < 0.05$ , \*\*  $P < 0.01$ , \*\*\*  $P < 0.001$ .

<sup>2</sup> As estimated by 24-h recall from Moshfegh A, Goldman J, Cleveland L. What we eat in America, NHANES 2001-2002: Usual nutrient intakes from food compared to dietary reference intakes. USDA, ARS: 2005. p. 1-56.

<sup>3</sup> Smoking status was not considered; smoking may change vitamin C requirements

<sup>4</sup> Comparison to EAR for ages 50 and older are difficult because 10-30 percent of older people may malabsorb food-bound Vitamin B-12

**Supplemental Table 3** Percent of adult (18+ y) men and women participating in the CoASTAL cohort meeting the DRI for minerals in comparison to adult (20+ y) men and women sampled in NHANES 2001-2002<sup>1,2</sup>

| Minerals    | Men         |                                    |                                   |                                   |                                     | Women       |                                    |                                   |                                    |                                     |
|-------------|-------------|------------------------------------|-----------------------------------|-----------------------------------|-------------------------------------|-------------|------------------------------------|-----------------------------------|------------------------------------|-------------------------------------|
|             | DRI         | NHANES<br>01-02<br><i>n</i> = 2380 | Total<br>sample<br><i>n</i> = 175 | Plausible<br>rEI<br><i>n</i> = 89 | Implausible<br>rEI<br><i>n</i> = 86 | DRI         | NHANES<br>01-02<br><i>n</i> = 2267 | Total<br>sample<br><i>n</i> = 243 | Plausible<br>rEI<br><i>n</i> = 147 | Implausible<br>rEI<br><i>n</i> = 96 |
|             | EAR         |                                    | % less than EAR                   |                                   |                                     | EAR         |                                    | % less than EAR                   |                                    |                                     |
| Phosphorous | 580-1055    | <3                                 | 5                                 | 0                                 | 11                                  | 580-1055    | 3                                  | 7                                 | 0                                  | 18                                  |
| Magnesium   | 330-350     | 64                                 | 80                                | 72                                | 88*                                 | 255-300     | 67                                 | 68                                | 61                                 | 77**                                |
| Iron        | 6.0-7.7     | <3                                 | 3                                 | 0                                 | 7                                   | 5.0-8.1     | 10                                 | 9                                 | 1                                  | 20***                               |
| Zinc        | 8.5-9.4     | 11                                 | 34                                | 18                                | 51***                               | 6.8-7.3     | 17                                 | 19                                | 11                                 | 31***                               |
| Copper      | 0.685-0.700 | <3                                 | 14                                | 2                                 | 27***                               | 0.685-0.700 | 10                                 | 19                                | 10                                 | 33***                               |
| Selenium    | 45          | <3                                 | 0                                 | 0                                 | 0                                   | 45          | <3                                 | 5                                 | 0                                  | 12                                  |
|             | AI          |                                    | % greater than AI                 |                                   |                                     | AI          |                                    | % greater than AI                 |                                    |                                     |
| Calcium     | 1000-1300   | 37                                 | 19                                | 27                                | 11**                                | 1000-1300   | 12                                 | 12                                | 12                                 | 13                                  |
| Potassium   | 4700        | 6                                  | 9                                 | 12                                | 5                                   | 4700        | <3                                 | 1                                 | 1                                  | 2                                   |
| Sodium      | 1200-1500   | >97                                | 55                                | 73                                | 36***                               | 1200-1500   | >97                                | 42                                | 46                                 | 34                                  |

<sup>1</sup> Values are %. Asterisks indicate different from plausible rEI: \*  $P < 0.05$ , \*\*  $P < 0.01$ , \*\*\*  $P < 0.001$ .

<sup>2</sup> As estimated by 24-h recall from Moshfegh A, Goldman J, Cleveland L. What we eat in America, NHANES 2001-2002: Usual nutrient intakes from food compared to dietary reference intakes. USDA, ARS: 2005. p. 1-56.
